# Supplementary material
Source: PubMed Central journal article supplement (PMC3337777)
Supplement: NIHMS368657-supplement-Appendix.pdf [file NIHMS368657-supplement-Appendix.pdf]

**Technical Appendix**

**eTable 1. Hospital Quality Alliance Quality of Care Process Measures**

| Condition                                | Quality Measure                                                                                                                      |
|------------------------------------------|--------------------------------------------------------------------------------------------------------------------------------------|
| <b>Acute Myocardial Infarction (AMI)</b> | Aspirin within 24 hours of admission                                                                                                 |
|                                          | Aspirin at the time of discharge                                                                                                     |
|                                          | Angiotensin converting enzyme (ACE) inhibitor or angiotensin receptor blocker (ARB) for left ventricular systolic dysfunction (LVSD) |
|                                          | Beta-blockers at the time of discharge                                                                                               |
|                                          | Fibrinolytic medication received within 30 minutes of hospital arrival                                                               |
|                                          | Percutaneous coronary intervention (PCI) Received Within 90 Minutes of Hospital Arrival                                              |
|                                          | Smoking cessation advice or counseling among smokers                                                                                 |
| <b>Congestive Heart Failure (CHF)</b>    | Evaluation of left ventricular systolic function                                                                                     |
|                                          | ACE inhibitor or ARB for LVSD                                                                                                        |
|                                          | Discharge instructions that address activity level, diet, medications, follow-up appointment, weight and symptom monitoring          |
|                                          | Smoking cessation advice or counseling among smokers                                                                                 |
| <b>Pneumonia</b>                         | Initial antibiotic therapy begun within 6 hours of arrival                                                                           |
|                                          | Pneumococcal vaccination status                                                                                                      |
|                                          | Influenza vaccination status                                                                                                         |
|                                          | Blood cultures performed prior to antibiotics being started                                                                          |
|                                          | Appropriate initial antibiotic selection                                                                                             |
|                                          | Smoking cessation advice or counseling among smokers                                                                                 |

Summary scores for each condition were calculated as the total number of times a hospital performed the appropriate action for each measure divided by the total number of opportunities the hospital had to provide appropriate care for that condition.

**eTable 2: Quality of Care**

| Quality Metrics                       | Critical Access Hospitals |             | Non-Critical Access Hospitals |             | P value          |
|---------------------------------------|---------------------------|-------------|-------------------------------|-------------|------------------|
|                                       | N reporting               | Score       | N reporting                   | Score       |                  |
| <b>Acute myocardial infarction</b>    |                           |             |                               |             |                  |
| Aspirin at arrival                    | 477                       | 92.4        | 3015                          | 98.4        | <0.001           |
| Aspirin at discharge                  | 431                       | 90.8        | 2978                          | 98.4        | <0.001           |
| Beta-blocker at discharge             | 429                       | 91.1        | 2985                          | 98.3        | <0.001           |
| ACE/ARB for LV systolic dysfunction   | 206                       | 87.9        | 2679                          | 95.4        | <0.001           |
| Smoking cessation counseling          | 122                       | 91.4        | 2595                          | 99.4        | <0.001           |
| Lytic within 30 minutes of arrival    | 37                        | 30.0        | 481                           | 54.8        | 0.008            |
| PCI within 90 minutes of arrival      | 2                         | 96.9        | 1501                          | 87.5        | 0.30             |
| <b>AMI Summary score</b>              | <b>497</b>                | <b>91.0</b> | <b>3028</b>                   | <b>97.8</b> | <b>&lt;0.001</b> |
| <b>Congestive heart failure</b>       |                           |             |                               |             |                  |
| ACE/ARB for LV systolic dysfunction   | 725                       | 84.8        | 3080                          | 94.0        | <0.001           |
| Assessment of LV function             | 845                       | 82.6        | 3119                          | 97.9        | <0.001           |
| Discharge instructions                | 829                       | 75.6        | 3115                          | 86.8        | <0.001           |
| Smoking cessation counseling          | 658                       | 85.7        | 3080                          | 98.4        | <0.001           |
| <b>CHF Summary score</b>              | <b>847</b>                | <b>80.6</b> | <b>3119</b>                   | <b>93.5</b> | <b>&lt;0.001</b> |
| <b>Pneumonia</b>                      |                           |             |                               |             |                  |
| Influenza vaccination                 | 831                       | 83.3        | 3104                          | 90.0        | <0.001           |
| Pneumococcal vaccination              | 895                       | 85.8        | 3121                          | 92.6        | <0.001           |
| Initial antibiotic within 6 hours     | 879                       | 95.0        | 3116                          | 94.8        | 0.57             |
| Smoking cessation counseling          | 849                       | 86.2        | 3111                          | 97.4        | <0.001           |
| Most appropriate initial antibiotic   | 888                       | 87.4        | 3113                          | 91.4        | <0.001           |
| Blood culture before first antibiotic | 836                       | 92.0        | 3088                          | 95.0        | 0.34             |
| <b>Pneumonia Summary score</b>        | <b>898</b>                | <b>89.3</b> | <b>3127</b>                   | <b>93.7</b> | <b>&lt;0.001</b> |

ACE-I = Angiotensin Converting Enzyme Inhibitor; ARB = Angiotensin Receptor Blocker; LV = left ventricular; PCI = percutaneous coronary intervention. N reporting indicates the number of hospitals submitting performance data for each measure.

**eTable 3: Quality of Care, adjusted for case mix and hospital characteristics**

| Quality Metrics                                           | Critical Access Hospitals |       | Non-Critical Access Hospitals |       | P value |
|-----------------------------------------------------------|---------------------------|-------|-------------------------------|-------|---------|
|                                                           | N reporting               | Score | N reporting                   | Score |         |
| <b>AMI Summary score</b>                                  | 497                       | 91.0  | 3028                          | 97.8  | <0.001  |
| <b>Adjusted for case mix</b>                              |                           | 91.4  |                               | 97.6  | <0.001  |
| <b>Adjusted for case mix and hospital characteristics</b> |                           | 91.5  |                               | 97.4  | <0.001  |
| <b>CHF Summary score</b>                                  | 847                       | 80.6  | 3119                          | 93.5  | <0.001  |
| <b>Adjusted for case mix</b>                              |                           | 81.0  |                               | 93.5  | <0.001  |
| <b>Adjusted for case mix and hospital characteristics</b> |                           | 81.3  |                               | 93.1  | <0.001  |
| <b>Pneumonia Summary score</b>                            | 898                       | 89.3  | 3127                          | 93.7  | <0.001  |
| <b>Adjusted for case mix</b>                              |                           | 89.4  |                               | 93.7  | <0.001  |
| <b>Adjusted for case mix and hospital characteristics</b> |                           | 89.4  |                               | 93.6  | <0.001  |

AMI=acute myocardial infarction; CHF=congestive heart failure. Hospital characteristics include teaching status, ownership, region, and membership in a hospital system.

**eTable 4: 30-day Mortality, excluding transfers**

|                                               | AMI   |         |                      | CHF   |         |                      | Pneumonia |         |                      |
|-----------------------------------------------|-------|---------|----------------------|-------|---------|----------------------|-----------|---------|----------------------|
|                                               | CAH   | Non-CAH | Odds Ratio           | CAH   | Non-CAH | Odds Ratio           | CAH       | Non-CAH | Odds Ratio           |
| <b>Proportion of patients transferred out</b> | 29.8% | 11.1%   | n/a                  | 7.4%  | 2.5%    | n/a                  | 5.6%      | 1.5%    | n/a                  |
| <b>Risk-adjusted mortality</b>                | 28.2% | 18.0%   | 1.95<br>(1.83, 2.09) | 12.9% | 10.9%   | 1.23<br>(1.19, 1.27) | 13.5%     | 12.0%   | 1.16<br>(1.10, 1.23) |

p<0.001 for all comparisons. AMI=acute myocardial infarction; CHF=congestive heart failure; CAH=Critical Access Hospital.

**eTable 5a: Hospital Characteristics, including only small, rural hospitals**

| Hospital Characteristics                             |            | Critical Access<br>Hospitals<br>N=1022 | Non-Critical Access<br>Hospitals<br>N=379 |
|------------------------------------------------------|------------|----------------------------------------|-------------------------------------------|
| Medical/surgical hospital bed capacity, median (IQR) |            | 18 (14, 24)                            | 33 (25, 41)                               |
| Ownership                                            | Public     | 479 (47%)                              | 127 (34%)                                 |
|                                                      | For-profit | 39 (4%)                                | 78 (21%)                                  |
|                                                      | Non-profit | 504 (49%)                              | 174 (46%)                                 |
| Major teaching hospital†                             |            | 0 (0%)                                 | 0 (0%)                                    |
| Rural / urban category (RUCA)                        | Urban      | 0 (0%)                                 | 0 (0%)                                    |
|                                                      | Large town | 0 (0%)                                 | 0 (0%)                                    |
|                                                      | Small town | 586 (57%)                              | 294 (78%)                                 |
|                                                      | Rural      | 436 (43%)                              | 85 (22%)                                  |
| Region                                               | Northeast  | 56 (5%)                                | 24 (6%)                                   |
|                                                      | Midwest    | 498 (49%)                              | 56 (15%)                                  |
|                                                      | South      | 270 (26%)                              | 259 (68%)                                 |
|                                                      | West       | 198 (19%)                              | 40 (11%)                                  |
| County income, median (IQR)                          |            | \$29,002 (25,624, 32,674)              | \$26,537 (23,893, 29,509)                 |
| Percent county poverty, median, (IQR)†               |            | 13.6 (10.8, 17.5)                      | 17.5 (13.9, 21.3)                         |
| Proportion Medicare patients                         |            | 57.7% (50.8, 68.3)                     | 52.2% (46.4, 57.3)                        |
| Proportion Medicaid patients                         |            | 11.0% (5.8, 16.0)                      | 15.9% (11.4, 21.9)                        |
| Volume of Medicare patients (median, IQR)*           | AMI        | 6 (3, 11)                              | 19 (9, 31)                                |
|                                                      | CHF        | 32 (17, 56)                            | 92 (53, 135)                              |
|                                                      | Pneumonia  | 57 (33, 88)                            | 122 (75, 170)                             |

AMI = acute myocardial infarction; CHF = congestive heart failure; IQR = Interquartile Range; RUCA=Rural Urban Commuting Area (Urban = 50,000 or more, Large town = 10,000-49,999, Small town = 2,500-9,999, Rural = <2,500)

\* Over the 23 month study period.

† p-value >0.05. Otherwise p-value for all comparisons <0.001.

**eTable 5b: Clinical and Technological Resources, including only small, rural hospitals**

| Clinical Resources                       |               | Critical Access Hospitals<br>N=1022 | Non-Critical Access Hospitals<br>N=379 | P value |
|------------------------------------------|---------------|-------------------------------------|----------------------------------------|---------|
| Member of hospital system                |               | 227 (27%)                           | 112 (33%)                              | 0.08    |
| Medical intensive care unit              |               | 259 (25%)                           | 200 (53%)                              | <0.001  |
| Cardiac intensive care unit*             |               | 94 (11%)                            | 51 (16%)                               | 0.01    |
| Cardiac catheterization                  |               | 2 (0.2%)                            | 19 (5%)                                | <0.001  |
| PET scanner*                             |               | 15 (2%)                             | 14 (4%)                                | 0.008   |
| Surgical capability                      |               | 875 (86%)                           | 354 (93%)                              | <0.001  |
| Nurse-to-census ratio, median (IQR)      |               | 7.0 (3.0, 11.1)                     | 6.3 (4.6, 8.5)                         | 0.18    |
| Total physicians per 100,000 (mean, SD)† |               | 86.2 (89.9)                         | 86.2 (56.5)                            | 0.05    |
| Generalists per 100,000 (mean, SD)†      |               | 50.4 (37.3)                         | 40.1 (25.2)                            | <0.001  |
| Cardiologists per 100,000 (mean, SD)†    |               | 0.7 (3.1)                           | 0.9 (2.0)                              | <0.001  |
| Pulmonologists per 100,000 (mean, SD)†   |               | 0.3 (1.3)                           | 0.5 (1.4)                              | 0.002   |
| Overall EHR adoption‡                    | Comprehensive | 12 (1%)                             | 13 (3%)                                | 0.05    |
|                                          | Basic         | 47 (5%)                             | 12 (3%)                                |         |
|                                          | None          | 933 (94%)                           | 344 (93%)                              |         |

\*=of 1192 hospitals reporting these measures. †=reported at the county level; means reported because medians were zero for CAH and therefore less interpretable. PET = positron emission tomography. ‡=based on responses from the hospitals that returned the HIT survey; all results are weighted for nonresponse bias to produce a representative sample.
